# Supplementary material
Source: publisher figshare collection journal article supplement (https://acs.figshare.com/ndownloader/files/6025476)
Supplement: Supplementary file 1 [file 6025476]

**Supporting Information**

**Few-Layer Tin Sulfide: A New  
Black-Phosphorus-Analogure 2D Material  
with Sizeable Band Gap, Odd-Even Quantum  
Confinement Effect, and High Carrier  
Mobility**

Chao Xin,<sup>#,†</sup> Jiaxin Zheng,<sup>#,†</sup> Yantao Su,<sup>†</sup> Shuankui Li,<sup>†</sup> Bingkai Zhang,<sup>†</sup> Yancong  
Feng<sup>†</sup> *and* Feng Pan<sup>\*†</sup>

<sup>†</sup>School of Advanced Materials, Peking University Shenzhen Graduate School,  
Shenzhen 518055, China

**Corresponding Author**

\*E-mail: panfeng@pkusz.edu.cn (F. Pan). Tel: +86-755-26033200

#These authors contributed equally.

### Supporting Information Figures

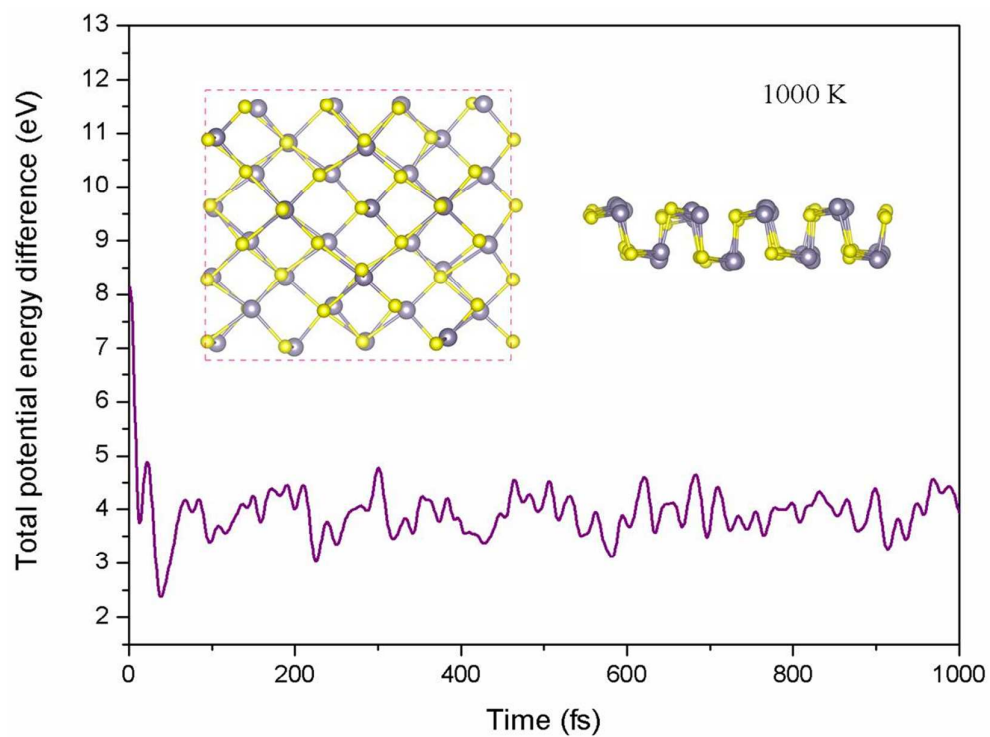

**Figure S11.** Total potential energy fluctuation during AIMD simulations of monolayer SnS at 1000 K. The insets show the snapshot at 1 ps for 4×4 supercell simulation.

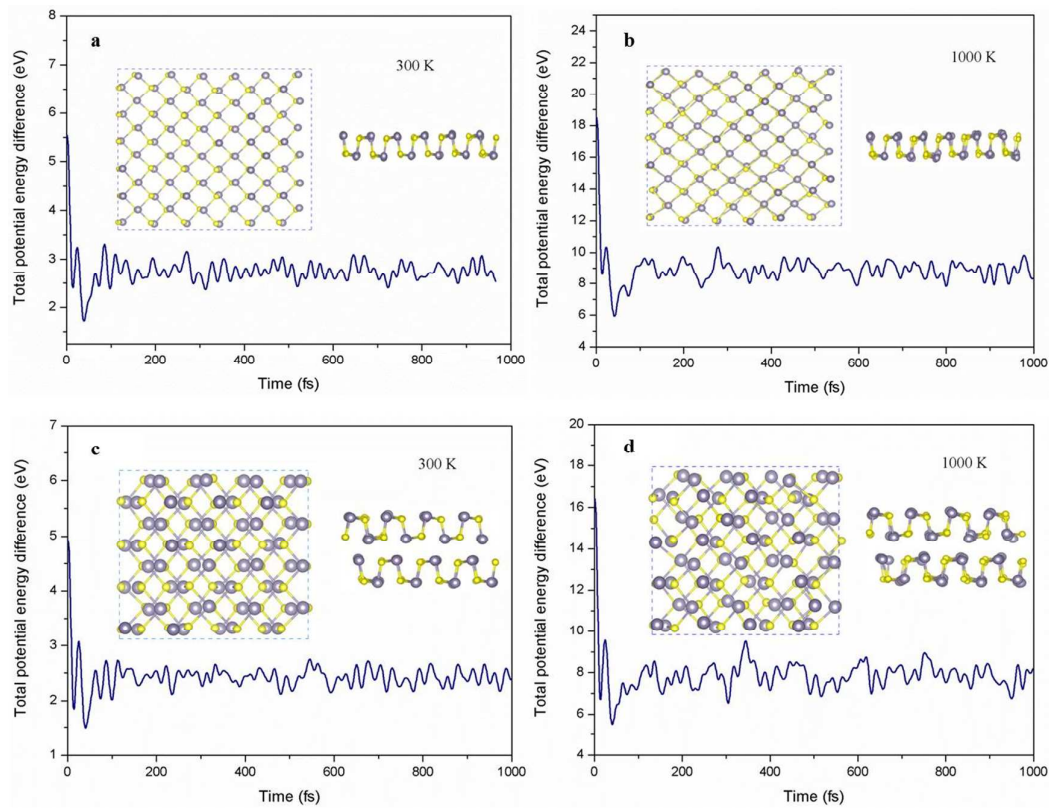

**Figure SI2.** Total potential energy fluctuation during AIMD simulations of SnS. (a,b) Monolayer at 300 K and 1000 K. (c,d) Bilayer at 300 K and 1000 K. The insets show the snapshot at 1ps for monolayer 6×6 and bilayer 4×4 supercell simulation.

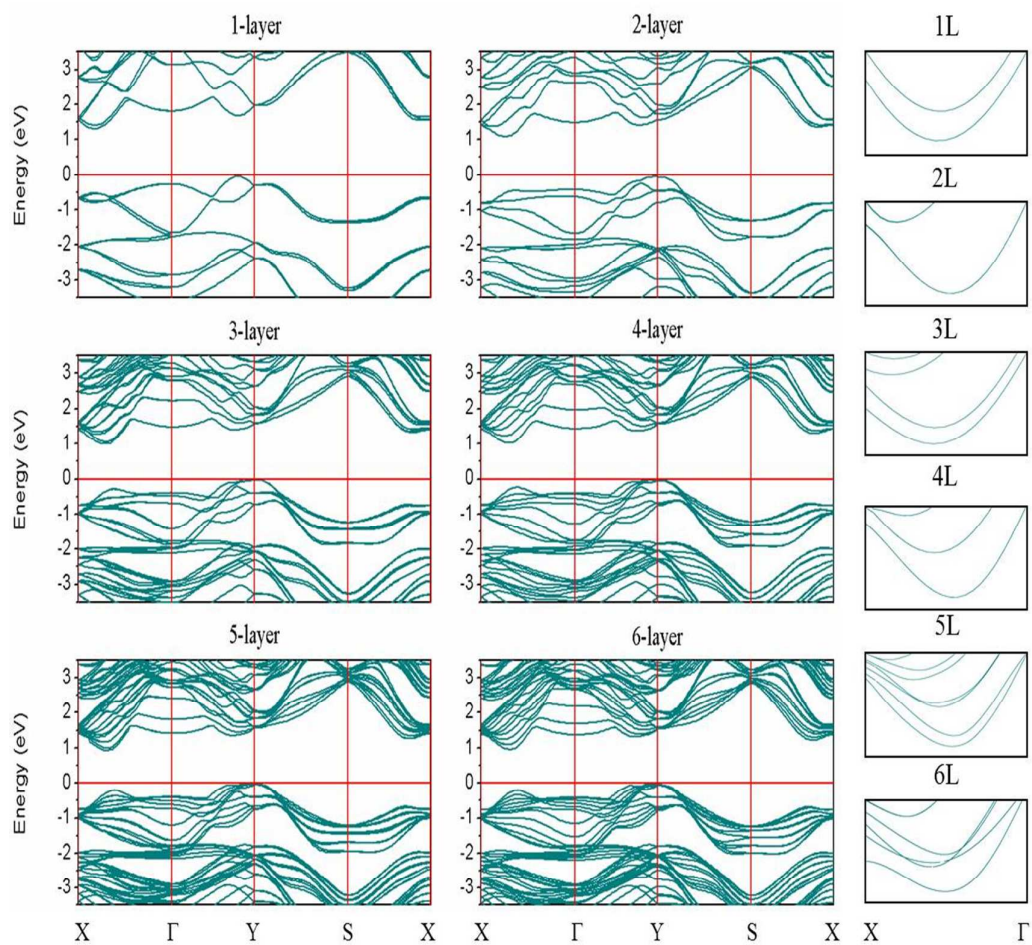

**Figure SI3.** Electronic band structures for bulk and few-layer (1-6) SnS. The magnified plotting of conduction-band minimum was placed at the right. Results were calculated using the PBE with SOC.

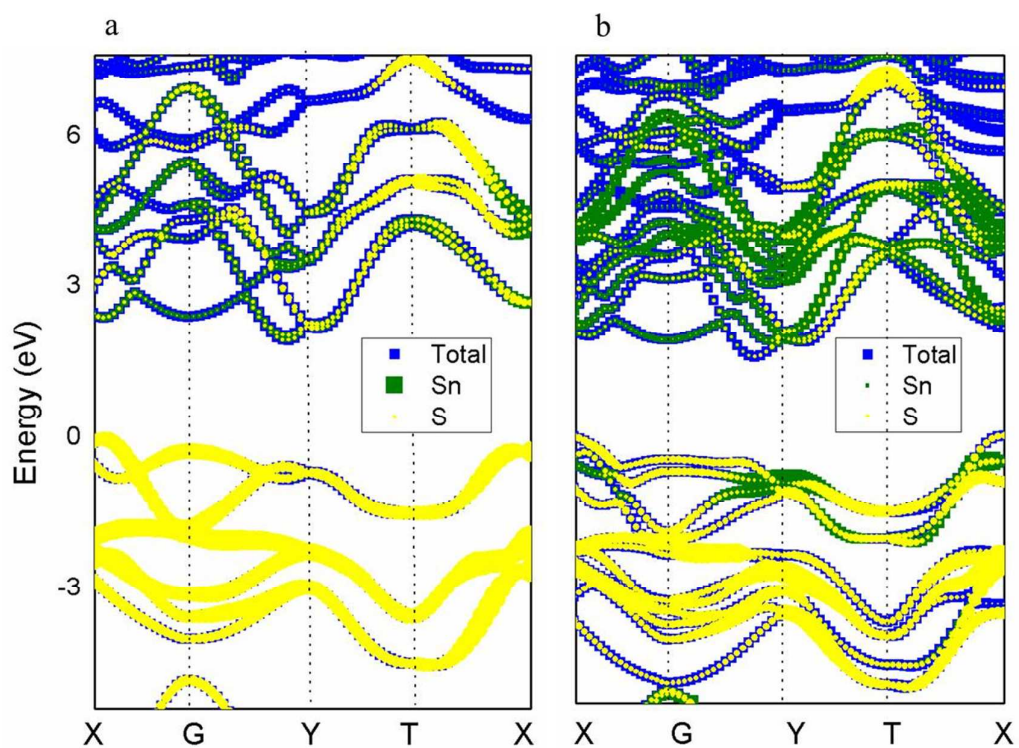

**Figure SI4.** Projection band structure of SnS. (a) monolayer, (b) bilayer.

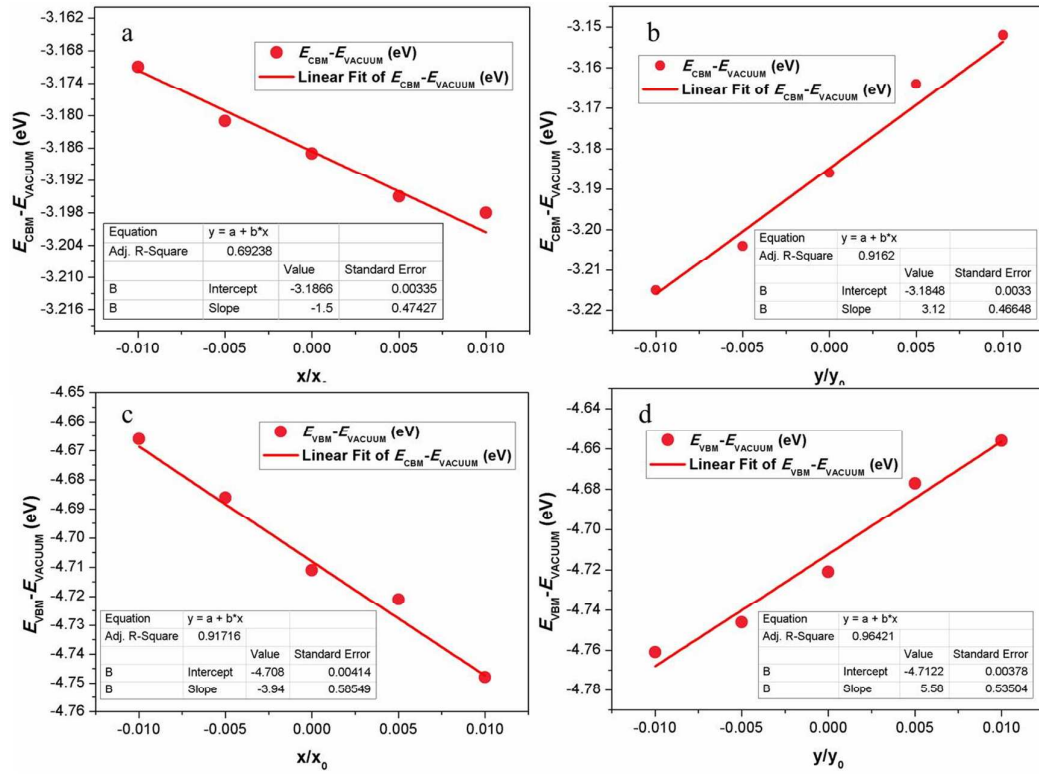

**Figure SI5.** Band energy of monolayer SnS. (a,b) The CBM of monolayer SnS. (c,d) The VBM of monolayer SnS.

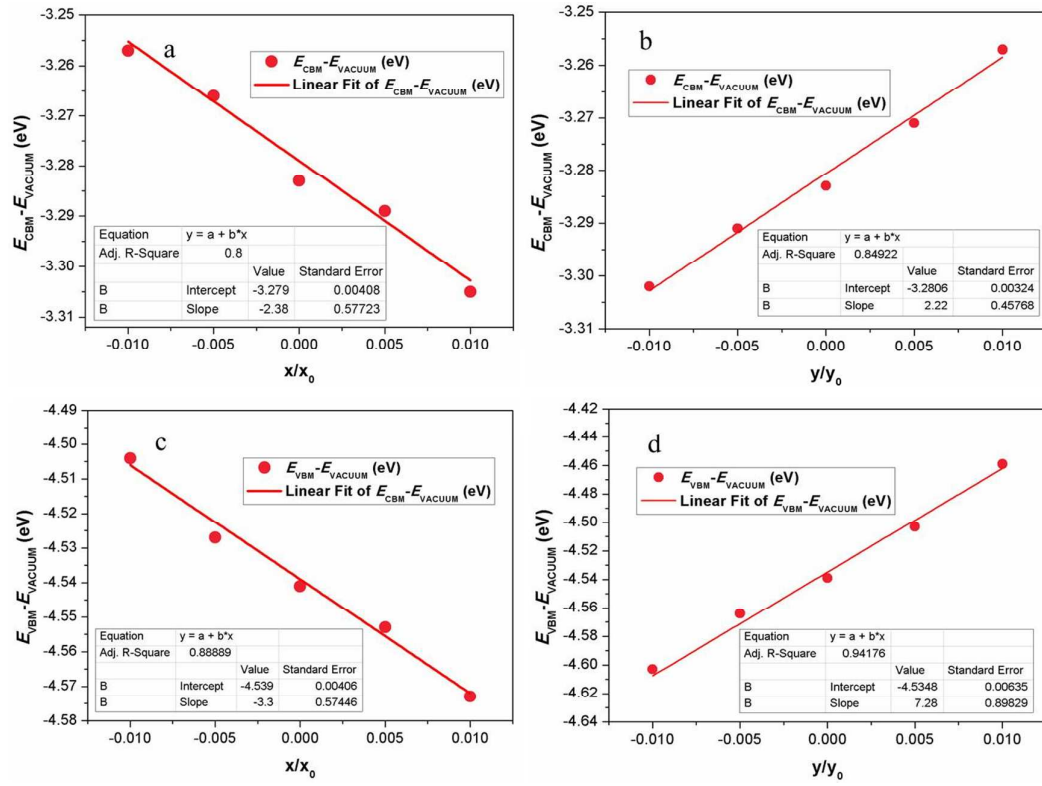

**Figure SI6.** Band energy of monolayer SnS. (a,b) The CBM of bilayer SnS. (c,d) The VBM of bilayer SnS.
